# Supplementary material for: Synthesis of Multifunctional Nanoparticles for the Combination of Photodynamic Therapy and Immunotherapy
Source: Pharmaceuticals (Basel). 2021 May 26;14(6):508. doi: 10.3390/ph14060508 (PMC8228393; doi:10.3390/ph14060508)
Supplement: Supplementary file 1 [file pharmaceuticals-14-00508-s001.zip › pharmaceuticals-1223950-supplementary.pdf]

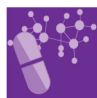

# Synthesis of Multifunctional Nanoparticles for the Combination of Photodynamic Therapy and Immunotherapy

Mei-Hwa Lee<sup>1,\*</sup>, James L. Thomas<sup>2</sup>, Jin-An Li<sup>3</sup>, Jyun-Ren Chen<sup>3</sup>, Tzong-Liu Wang<sup>3</sup> and Hung-Yin Lin<sup>3,\*</sup>

<sup>1</sup>Department of Materials Science and Engineering, I-Shou University, Kaohsiung 84001, Taiwan

<sup>2</sup>Department of Physics and Astronomy, University of New Mexico, Albuquerque, NM 87131, USA

<sup>3</sup>Department of Chemical and Materials Engineering, National University of Kaohsiung, Kaohsiung 81148, Taiwan

## S1. Experimental Section

### S1.1 Characterization of magnetic peptide-imprinted polymer composite nanoparticles

Magnetic, peptide- and non-imprinted EVAL composite particles were examined with a particle sizer (90Plus, Brookhaven Instruments Co., NY). The measurement of the particle size distribution was based on dynamic light scattering (DLS) at 25°C with 3 min duration data collection at the 90° detection angle. The average count rate of the background was 15 kcps and that of each measurement was between 20 ~ 500 kcps. The magnetization of magnetic, peptide-imprinted polymeric nanoparticles before and after template removal was measured with a magnetic property measurement MPMS XL-7 system (Quantum Design, San Diego, CA) at 298 K in  $\pm 15000$  Gauss. The adsorption of peptide on nanoparticles was examined with a high-pressure liquid chromatography (HPLC) system. Peptide solution (1.0 mg/mL) in water was diluted to various concentrations for calibration. The solutions were passed through a 0.22  $\mu$ m PVDF syringe filter (Advangene Consumables Inc., USA) and then injected into a high-pressure liquid chromatography (HPLC) system for analysis of peptide. The separation was performed on a Kromasil 100-5 C18 column (5  $\mu$ m particle size, pore size 100 Å, 25 cm  $\times$  4.6 mm I.D., SigmaAldrich, USA). The sample (20  $\mu$ L) was eluted with a mobile phase composed of 0.1% TFA in 100% water (solvent A) and 0.1% TFA in 100% acetonitrile (solvent B). The gradient profile for peptide was: 0-0.1 min, 67% A, 33% B; 0.1-25 min, 42% A, 58% B; 25.01-30 min, B 100%. The flow rate and detection wavelength were set to be 1.0 mL/min and 220 nm, respectively, and the retention times for the peptide was 4.49 min.

**Table S1.** The sequence of primers used in this work, including GAPDH, Casp8, Casp3, Casp9, CYCS, Bax, Bid, and Bcl-2.

|       | Sequence             |                      | Primer |
|-------|----------------------|----------------------|--------|
|       | Forward              | Reverse              |        |
| GAPDH | ACAGTTGCCATGTAGACC   | TTTTTGGTTGAGCACAGG   |        |
| Casp8 | CTACAGGGTCATGCTCTATC | ATTGAGATTTCCTCTTGC   |        |
| Casp3 | AAAGCACTGGAATGACATC  | CGCATCAATTCCACAATTTC |        |
| Casp9 | CTCTACTTTCCCAGGTTTTG | TTTCACCGAAACAGCATTAG |        |
| CYCS  | AAGAACAAAGGCATCATCTG | GCTATTAAGTCTGCCCTTTC |        |
| Bax   | AACTGGACAGTAACATGGAG | TTGCTGGCAAAGTAGAAAAG |        |
| Bid   | CTTAGCCAGAAATGGGATG  | AGTCACAGCTATCTTCCAG  |        |
| Bcl-2 | GATTGTGGCCTTCCTTTGAG | GTTCCACAAAGGCATCC    |        |

**Table S2.** Prescreening of the binding of peptide molecules to magnetic peptide- and non-imprinted poly(ethylene-co-vinyl alcohol) nanoparticles. Imprinting effectiveness for four different ethylene mol-% are shown. Standard deviations are based on three individual measurements.

|    | Peptide adsorption ( g/g) EVAL (ethylene mole %) |             |      |
|----|--------------------------------------------------|-------------|------|
|    | MPIPs                                            | MNIPs       | IF   |
| 27 | 27.71± 1.97                                      | 13.88± 6.20 | 2.00 |
| 32 | 38.33± 0.88                                      | 42.17± 0.57 | 0.91 |
| 38 | 59.35± 0.24                                      | 58.05± 2.54 | 1.02 |
| 44 | 58.78±0.83                                       | 56.86± 0.31 | 1.03 |

MPIPs: Magnetic peptide-imprinting polymer nanoparticles; MNIPs: Magnetic non-imprinting polymers. nanoparticles;  
IF: Imprinting effectiveness. \*

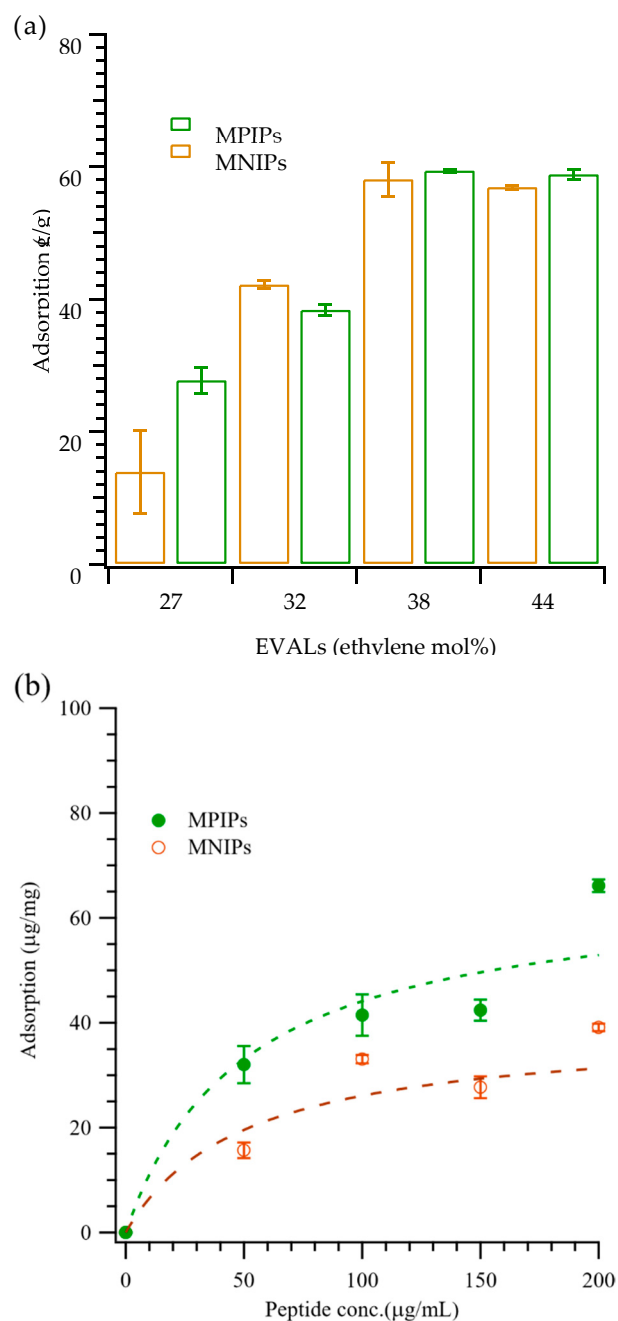

**Figure S1.** (a) Adsorption of peptide (50  $\mu\text{g/mL}$ ) on the MPIPs with imprinted onto various ethylene mol% of EVAL (b) Isothermal adsorption of MPIPs and MNIPs with various of peptide concentrations.

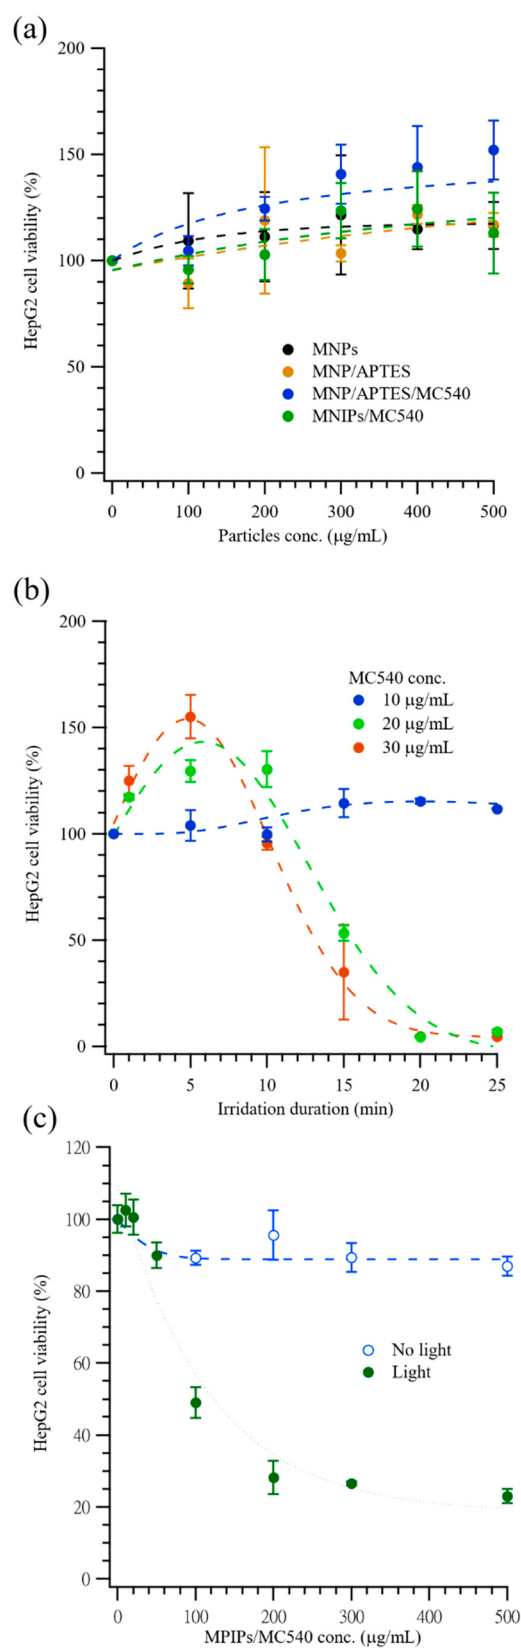

**Figure S2.** Cellular viability of HepG2 cells with (a) various concentrations of MNPs, MNP/APTES, MNP/APTES/MC540, and MNIPs/MC540; (b) various concentrations of free MC540 and irradiation durations; (c) various concentrations of MPIPs/MC540 with and without irradiation. In all figures, error bars represent the standard deviation of 3 or more wells.

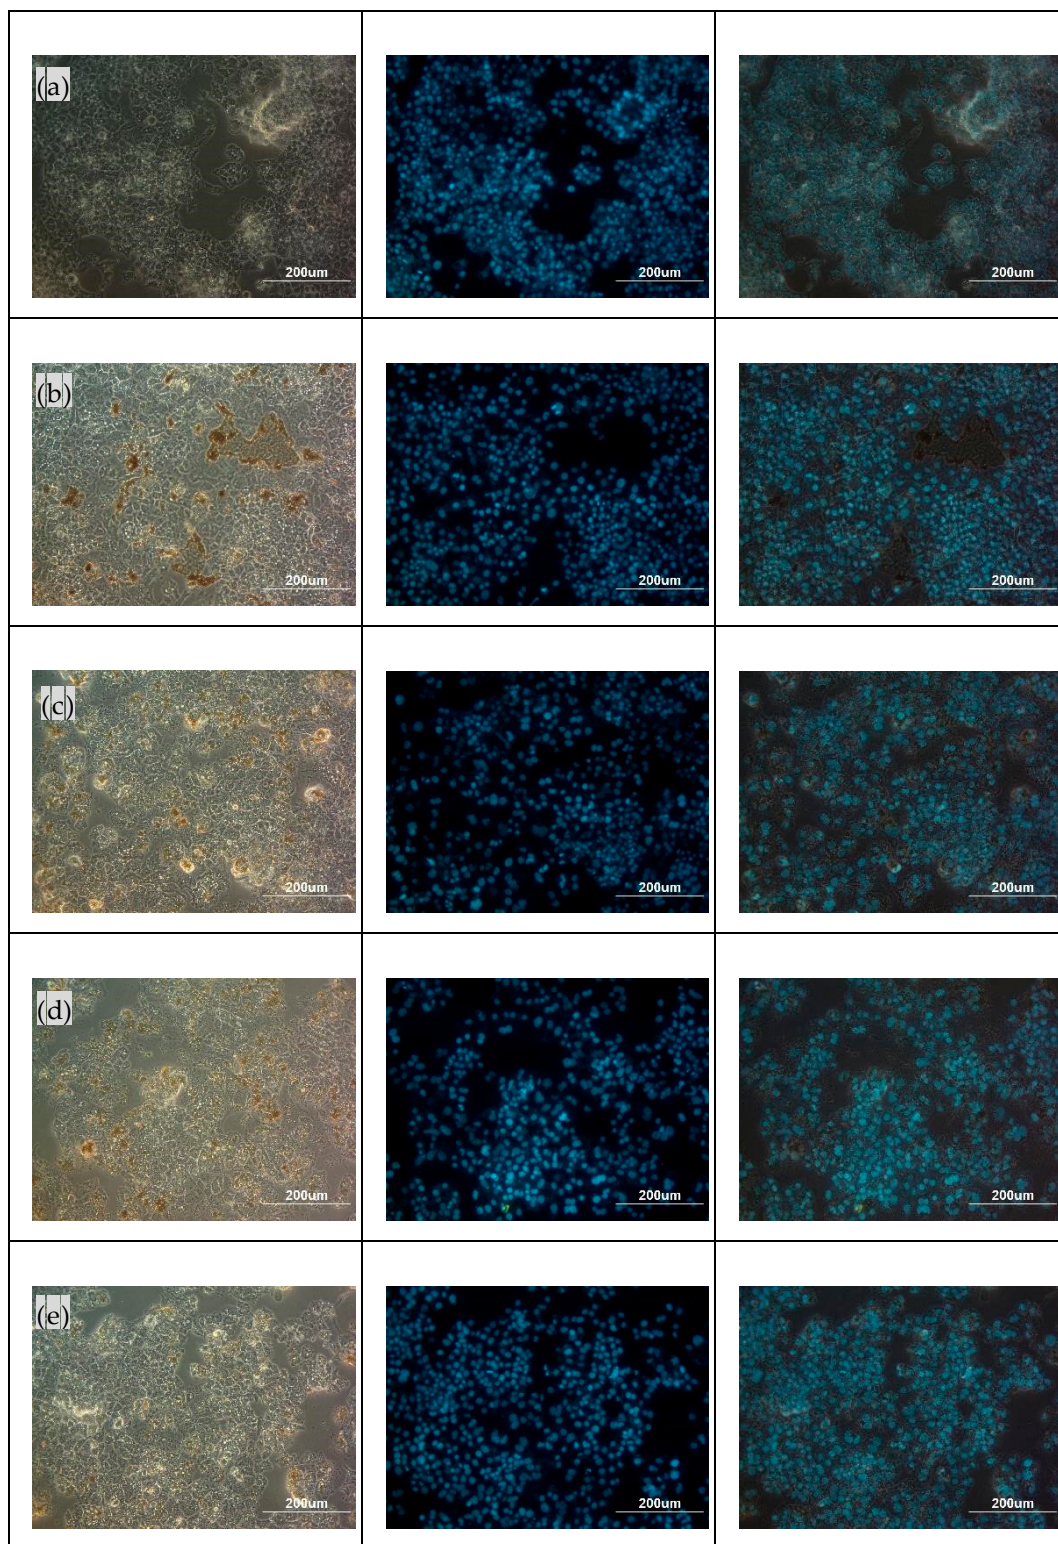

**Figure S3.** Optical, DAPI stained and merged images (from left to right columns) of (a) HepG2 cells; with MNPs (b); with MNPs/APTES (c), with MNPs/APTES/MC540 (d); and MNIPs/MC540 (e).

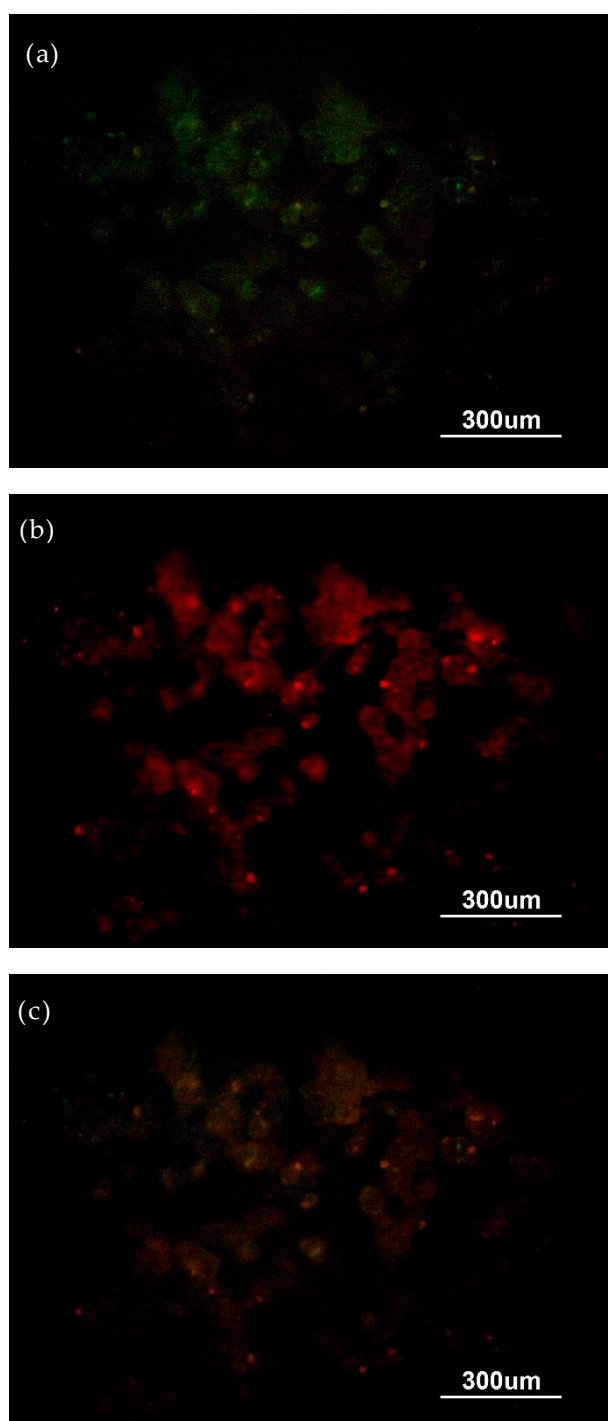

**Figure S4.** (a) Immunostaining of CD-133 on HepG2 cells, (b) MPIPs/MC540 and (c) their merge image. .

(a)

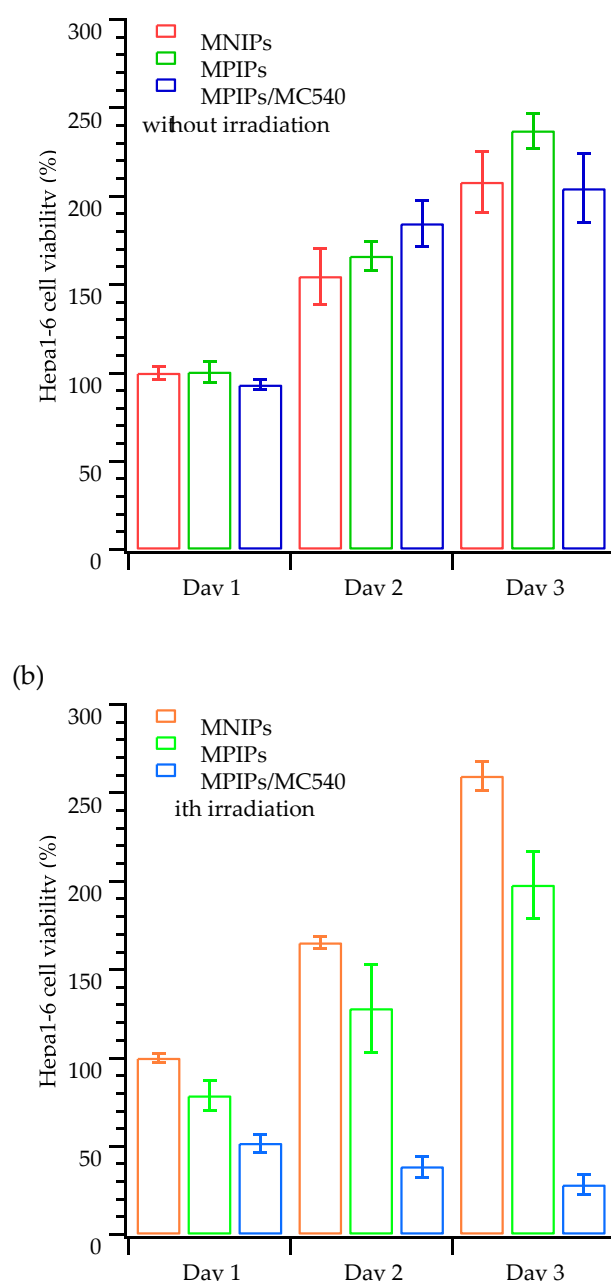

**Figure S5.** Continuous cellular viability measurements of Hepa1-6 cells incubated with 100 g/mL of MNIPs, MPIP's and MPIP's/MC540 (a) without or (b) with irradiation.
